# Supplementary material
Source: publisher figshare collection journal article supplement (https://karger.figshare.com/ndownloader/files/14845718)

**e-Figure 1 Associations of baseline age with incident impairment and death**


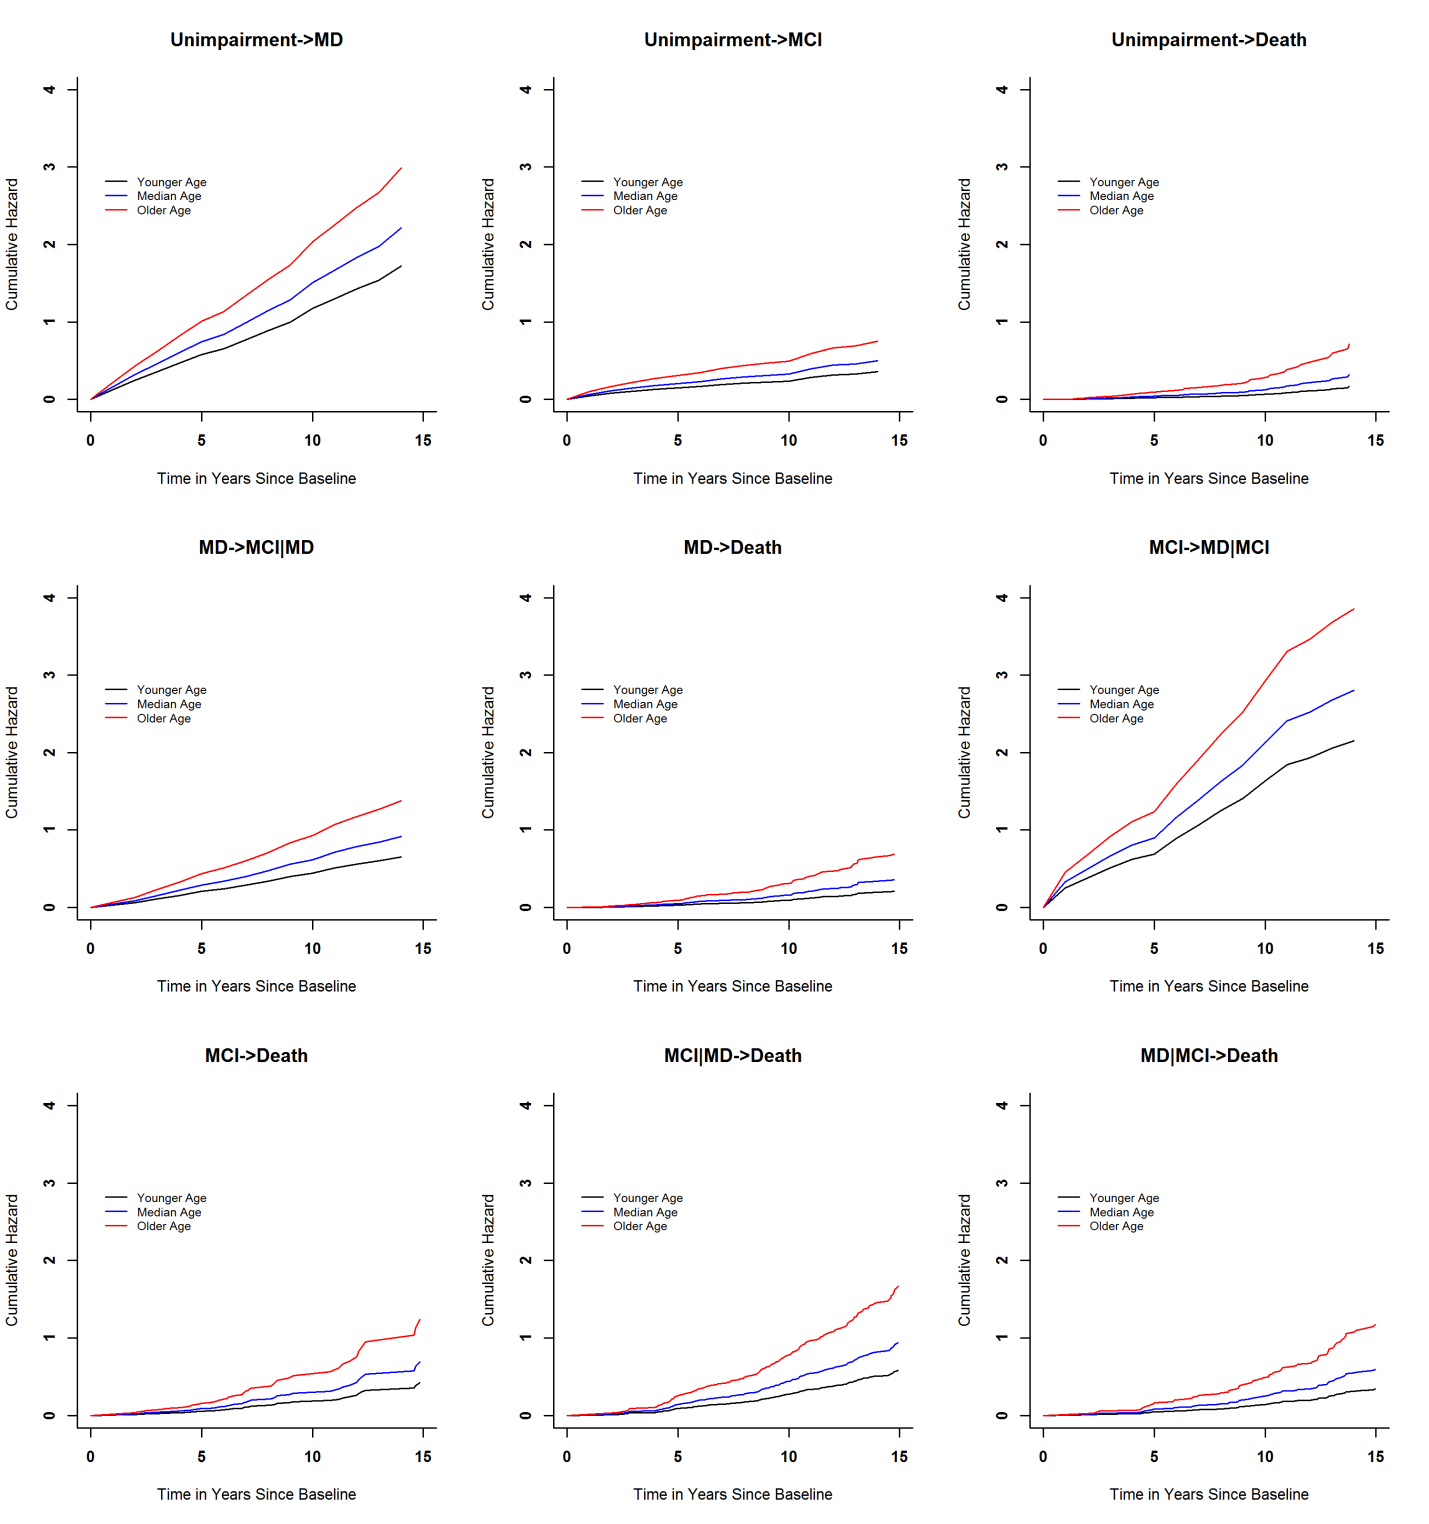


**e-Figure 2 Associations of sex with incident impairment and death**


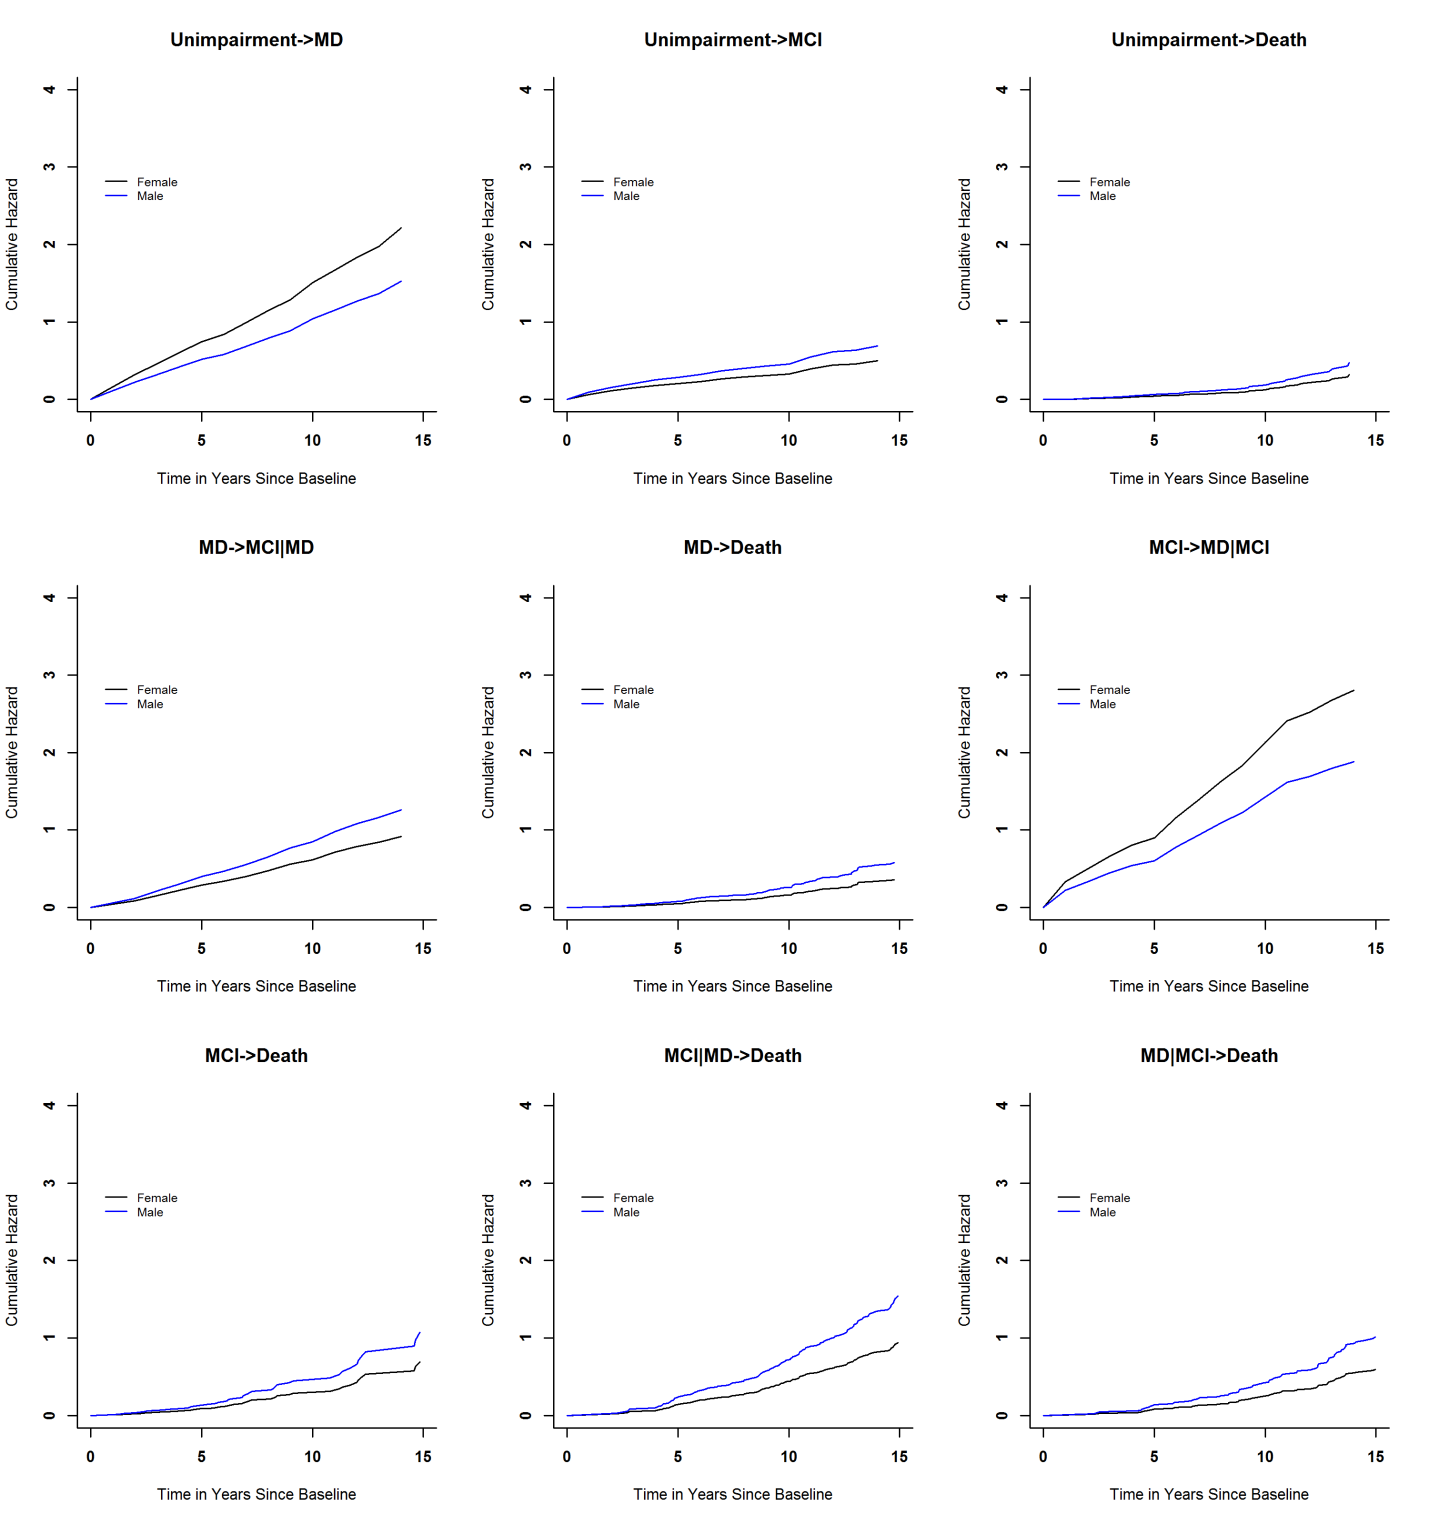

Supplement: Supplementary file 1 [file 14845718]
